# Supplementary figures and images for: The first comprehensive database of germline pathogenic variants in East Asian cancer patients
Source: Oxford University Press journal article supplement (doi:10.1093/database/baab075), 2021-01-01

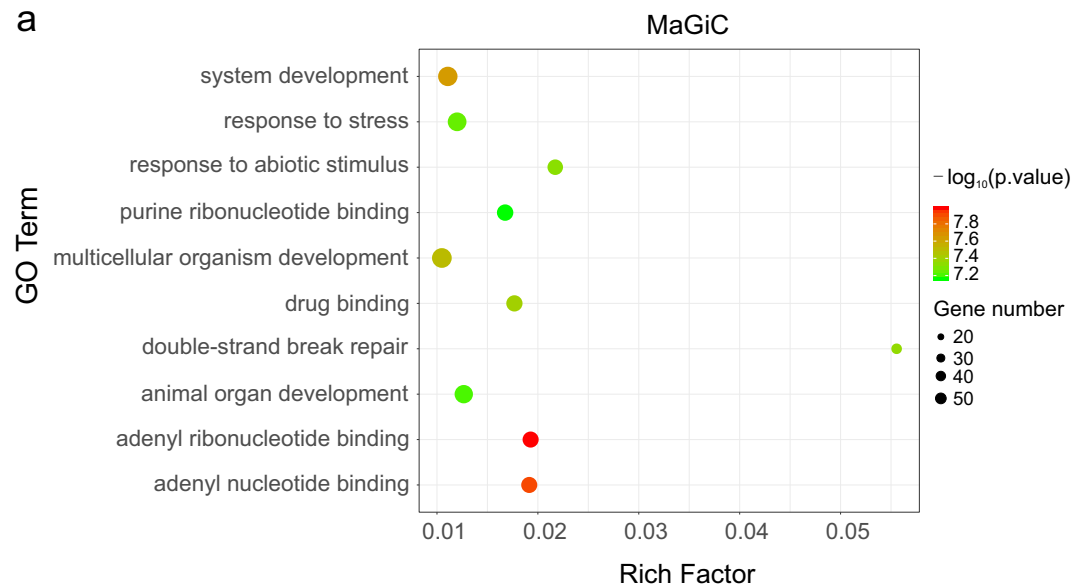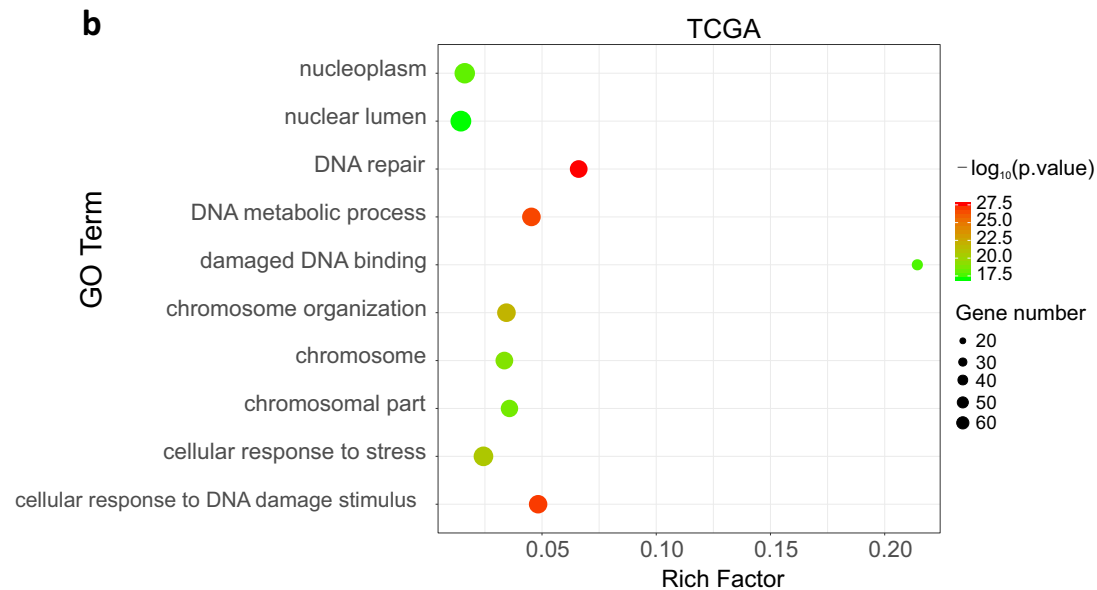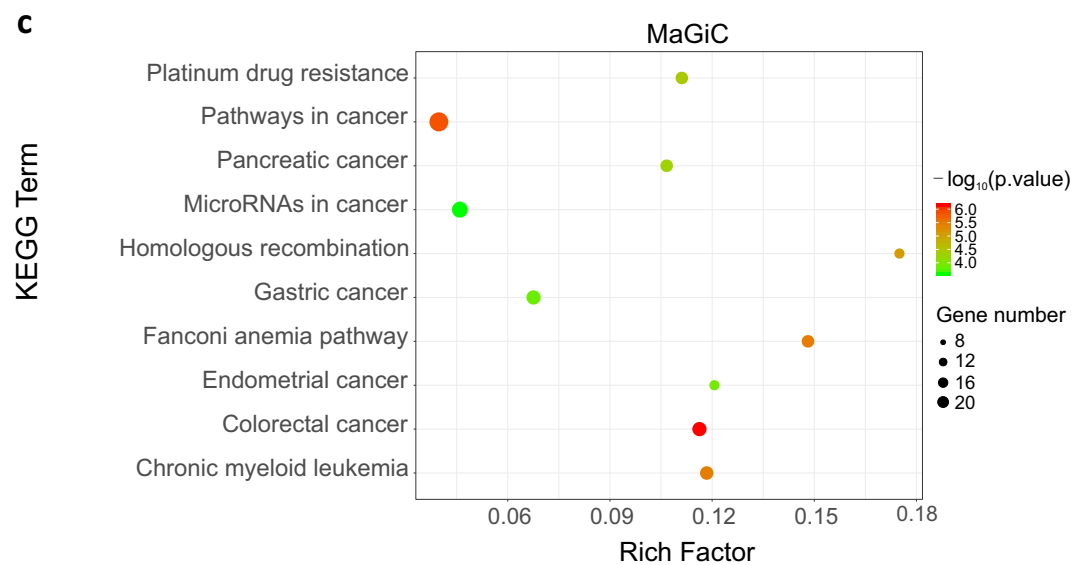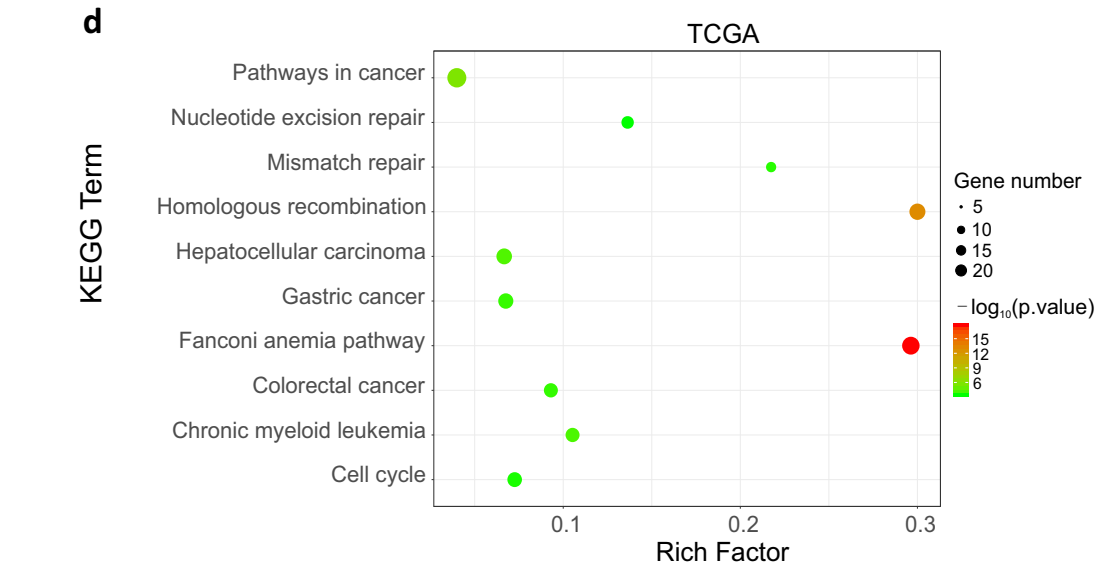

Supplement: baab075_supp.zip [file baab075_supp.zip]
